# Supplementary material for: Manufacturing of open-cell aluminum foams via infiltration casting in super-gravity fields and mechanical properties
Source: Royal Society of Chemistry journal article supplement (doi:10.1039/c7ra13689g), 2018-01-01
Supplement: c7ra13689g1.pdf [file c7ra13689g1.pdf]

1 **Supporting Information**

2

3 **Manufacturing of open-cell aluminum foams via infiltration casting in super-gravity**

4 **fields and mechanical properties**

5

6

7 Zhe Wang\*, Jintao Gao, Kuan Chang, Long Meng, Ning Zhang and Zhancheng Guo

8

9 State Key Laboratory of Advanced Metallurgy, University of Science and Technology

10 Beijing, Beijing 100083, China.

11

12 Corresponding author\* Zhe Wang email: [zhewang@ustb.edu.cn](mailto:zhewang@ustb.edu.cn)

# 1 Supplementary Figures

2

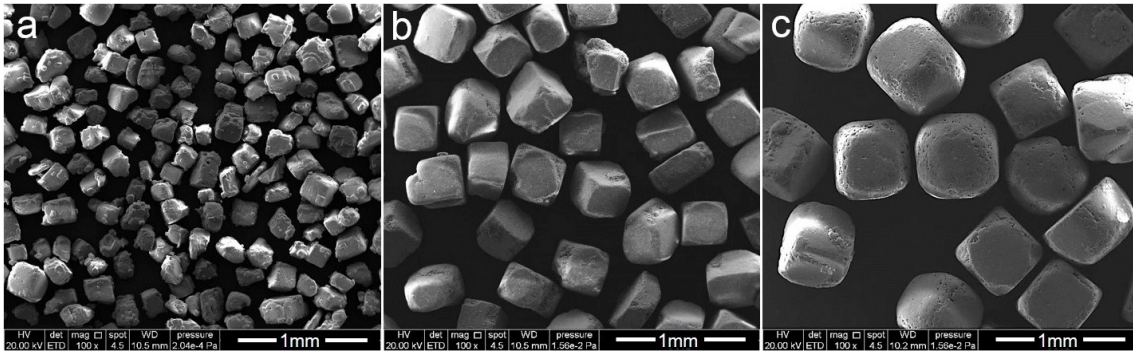

3

4 **Fig. S1.** SEM images of the original NaCl particles with different sizes used for the NaCl  
5 preform. (a) 200  $\mu\text{m}$ , (b) 400  $\mu\text{m}$  and (c) 600  $\mu\text{m}$ .

6

7

8

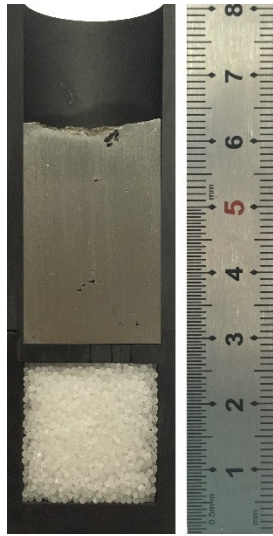

1

2 **Fig. S2.** Image of the cross section of a graphite crucible containing NaCl preform and  
3 aluminum in the lower crucible and upper crucible, respectively

1

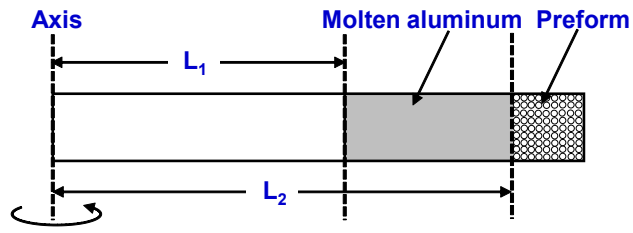

2

3

4

**Fig. S3.** Schematic of the super-gravity infiltration process

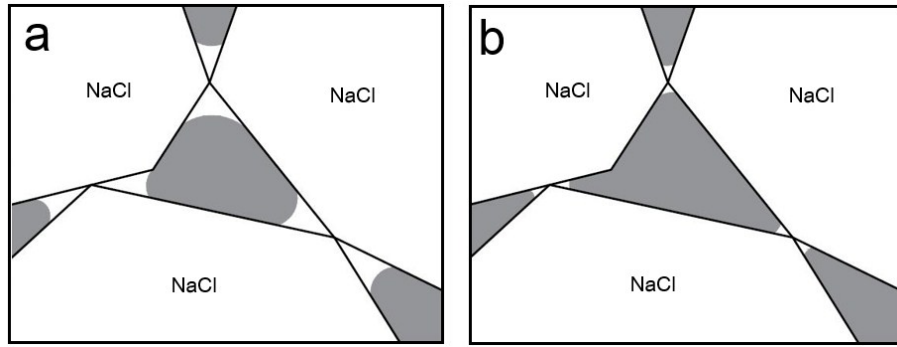

1

2 **Fig. S4** Schematic of the gradual infiltration of molten metal into NaCl preform. (a) at low  
3 pressures, the molten metal only infiltrates wider regions in the preform; (b) at high pressures,  
4 the molten metal infiltrates narrower spaces in the preform.

5
